# Supplementary material for: Antibacterial gold nanoclusters combined with meropenem for the treatment of sepsis by alleviating the cytokine storm
Source: Royal Society of Chemistry journal article supplement (doi:10.1039/d5na00234f), 2025-01-01
Supplement: d5na00234f1.zip [file d5na00234f1.zip]

Figure S1. **Characteristics of AuDAMP.**

Figure S2. **Effects of AuDAMP on liver and kidney function in normal mice.**
